# Supplementary material for: Quantifying location error to define uncertainty in volcanicmass flow hazard simulations
Source: Copernicus journal article supplement (doi:10.5194/nhess-2021-49), 2021-02-17
Supplement: Supplementary file [file nhess-2021-49-AC3-supplement.pdf]

Figures

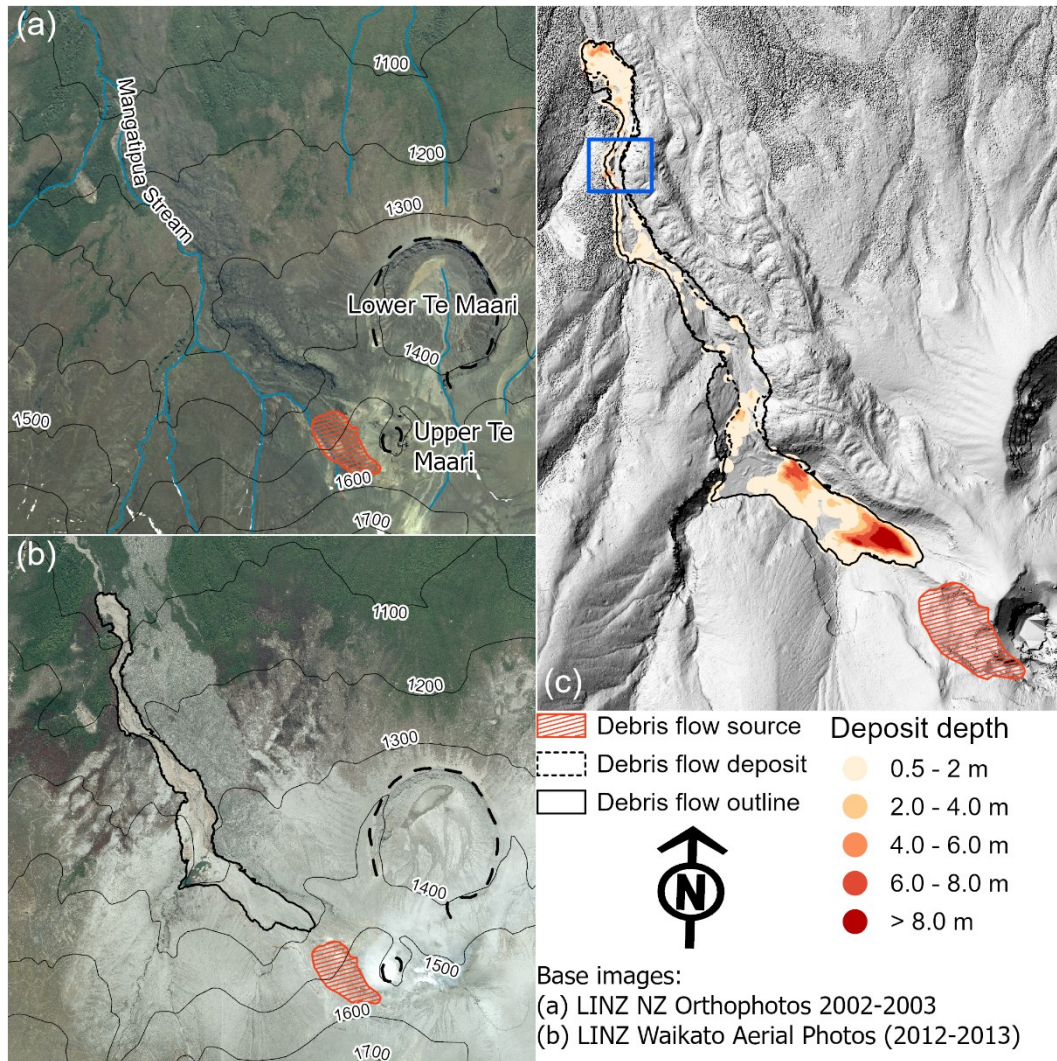

Figure 1. Te Maari debris avalanche case study region (a) pre-eruption, (b) post-eruption, and (c) debris avalanche deposit depth and outline. Blue rectangle in (c) shows area of spurious elevations from source Digital Terrain Model.

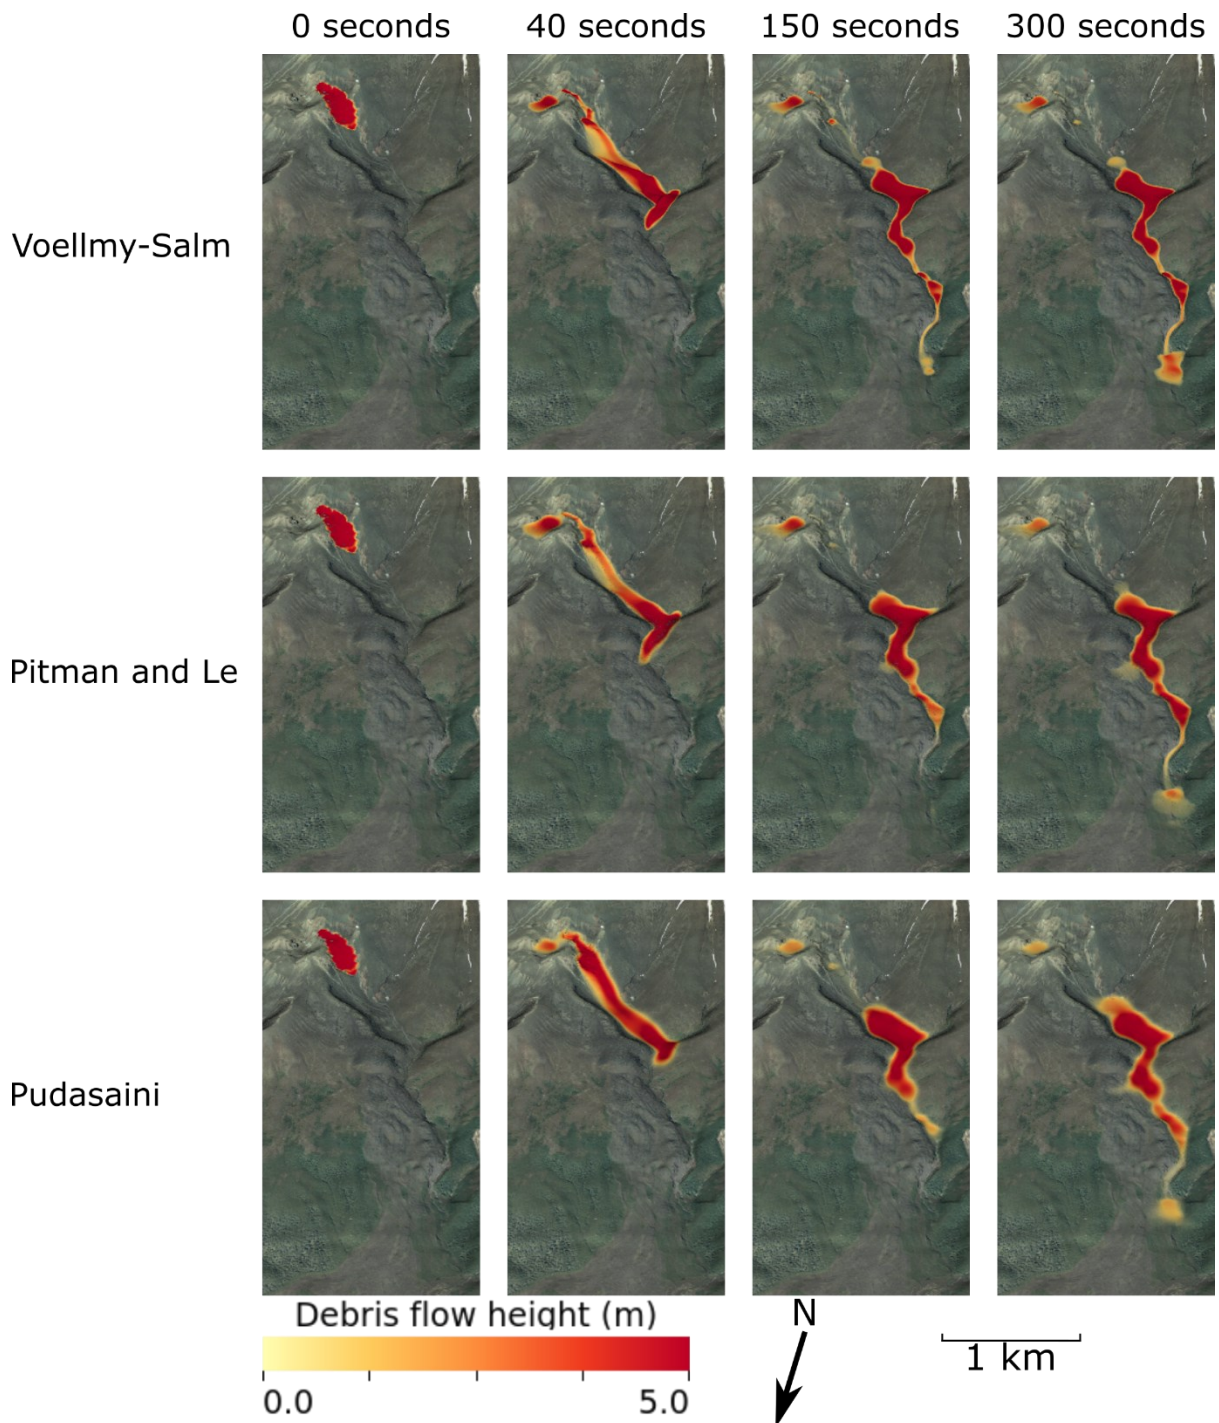

5

Figure 2. Snapshots of simulated debris flow height for each flow model at 0, 40, 150 and 300 seconds after initiation. Aerial basemap sourced from LINZ Waikato Aerial Photos (2012-2013).



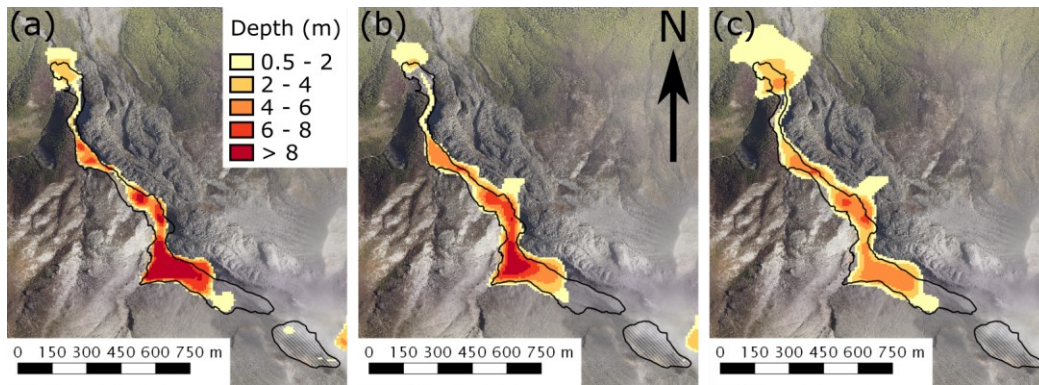

Figure 3. Simulated deposit depth for (a) Voellmy-Salm, (b) Pitman and Le (2005), and (c) Pudasaini (2012) models compared with the observed deposit and source outline (black). Aerial basemap sourced from LINZ Waikato Aerial Photos (2012-2013).

10

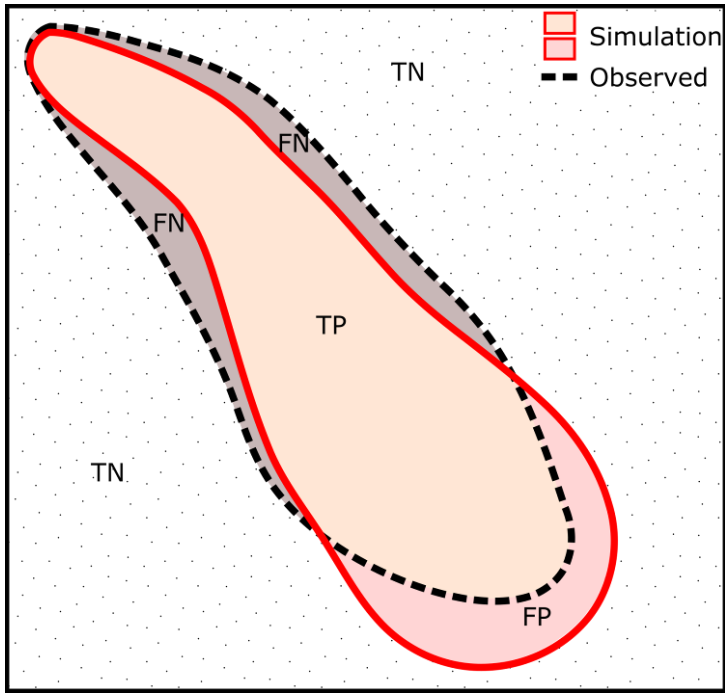

Figure 4. Illustration of confusion matrix classification for simulation performance assessment. Dashed black outline represents the observed flow outline; solid red outline represents the simulated flow outline. Areas outside of both simulated and observed flow outlines are classed as True Negatives (TN, dotted region); areas outside simulated outline but inside observed outline are classed as False Negatives (FN); areas inside both simulated and observed outline are classed as True Positives (TP); areas inside simulated outline but outside observed outline are classed as False Positives (FP).

15

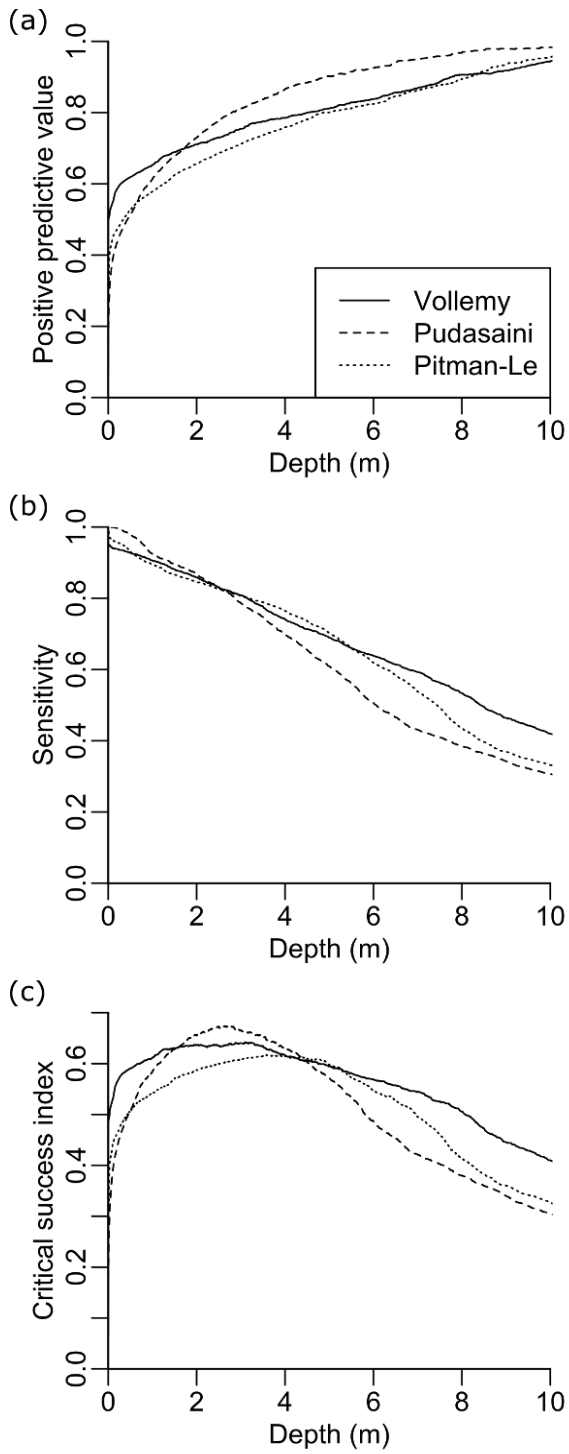

Figure 5. Flow outline performance with depth for Voellmy-Salm (solid line), Pudasaini (2012) (dashed line) and Pitman and Le (2005) (dotted line) flow models. Performance metrics are: (a) positive predictive value (PPV), (b) Sensitivity, and (c) Critical success index (CSI).

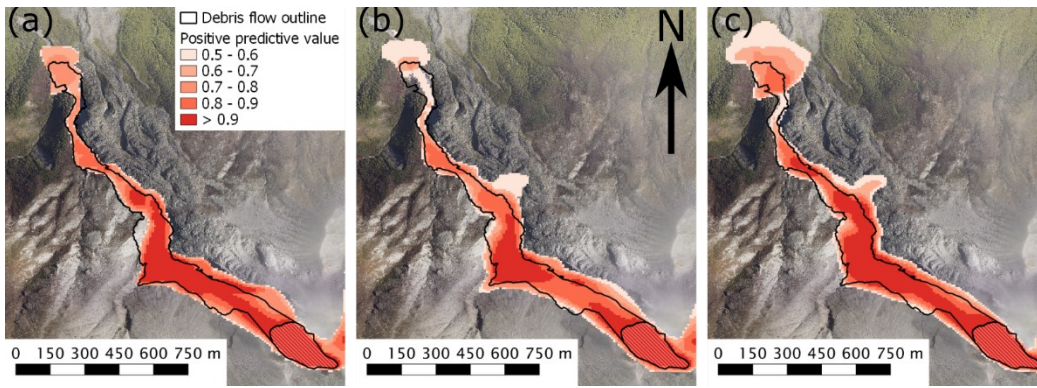

Figure 6. Positive predictive values for (a) Voellmy-Salm, (b) Pitman and Le (2005), and (c) Pudasaini (2012) simulations. The observed flow and source are outlined in black. Aerial basemap sourced from LINZ Waikato Aerial Photos (2012-2013).

25

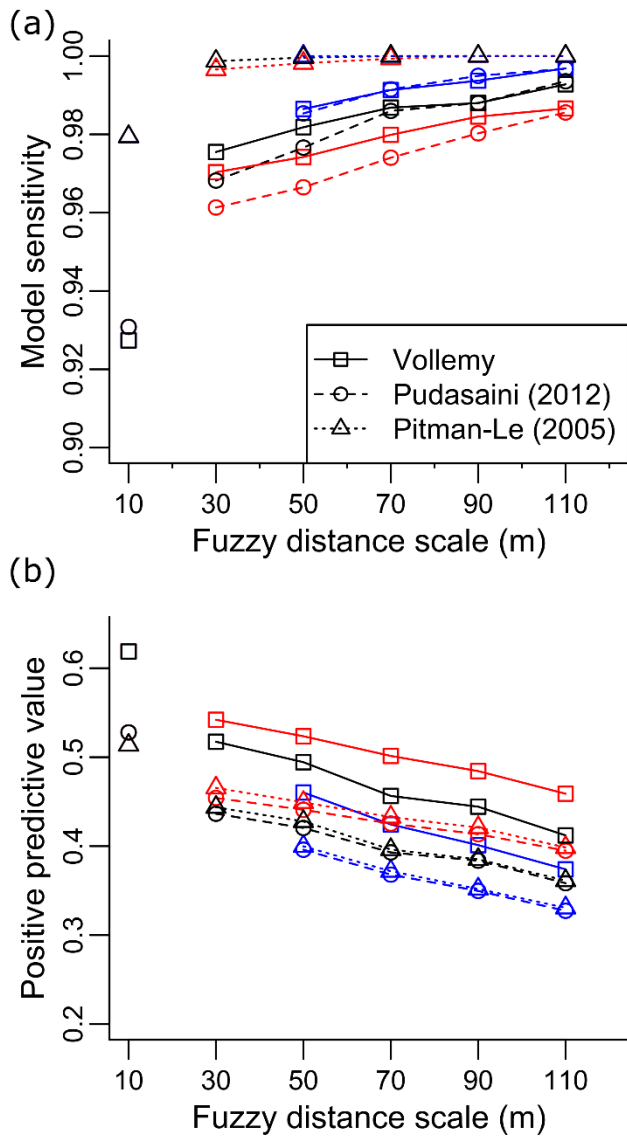

Figure 7. Fuzzy performance metrics at 3 cell (30 m), 5 cell (50 m), 7 cell (70 m), 9 cell (90 m) and 11 cell (110 m) length scales ( $\lambda$ ) and fuzzy quantities of 0.1 (blue), 0.25 (black) and 0.5 (red) for (a) model sensitivity and (b) positive predictive value for Voellmy-Salm (solid line), Pudasaini (2012) (dashed line) and Pitman and Le (2005) (dotted line) flow models.



Model scale (10 m)

70 m lengthscale

Te Maari Debris flow outline  
Debris flow hazard zone

Te Maari Debris flow outline  
Debris flow hazard zone

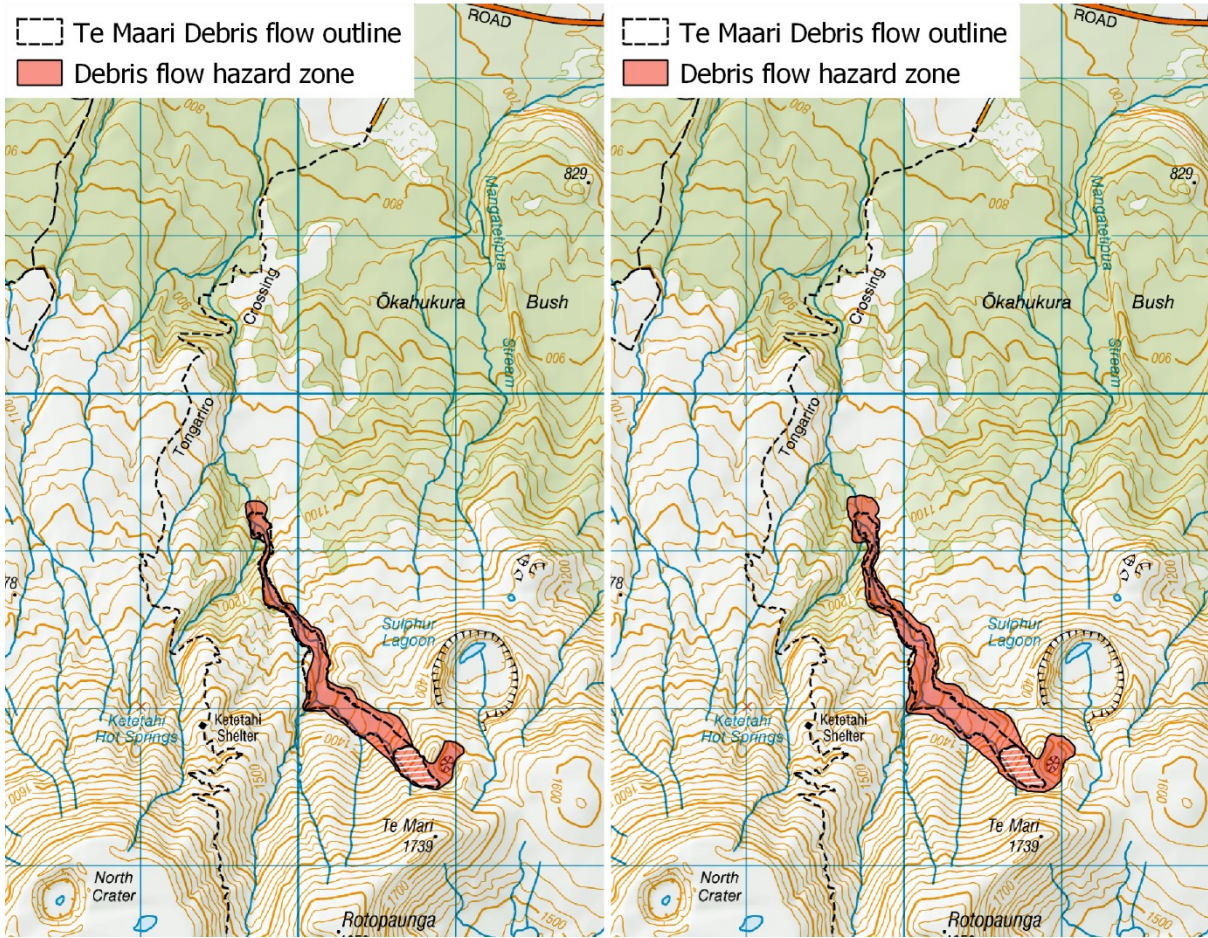

30

**Figure 8. Hazard zones generated from simulations at (left) 10 m model scale, and (right) using fuzzy length scale of 70 m. Hazard outline for model scale is generated where flow heights exceed 0.5 m. Hazard outline for 70 m scale is generated where fuzzy quantity exceeds 0.25. Hazard zones are overlain on New Zealand Topo50 map from Land Information New Zealand (LINZ), blue gridlines are 1 km apart, oriented North-South and East-West.**
